# Supplementary material for: Lab-on-a-lollipop (LoL) platform for preventing food-induced toxicity: all-in-one system for saliva sampling and electrochemical detection of vanillin
Source: Royal Society of Chemistry journal article supplement (doi:10.1039/d4lc00436a), 2024-01-01
Supplement: d4lc00436a1.pdf [file d4lc00436a1.pdf]

# Lab on a Lollipop (LoL) Platform for Preventing Food-Induced Toxicity: All-in-One System for Saliva Sampling and Electrochemical Detection of Vanillin

Haozheng Ma, Sina Khazaei Nejad, Daniel Vargas Ramos,  
Abdulrahman Al-Shami, Ali Soleimani, Farbod Amirghasemi, Mona A. Mohamed, and  
Maral P. S. Mousavi

## 1 Optimization of nafion modification

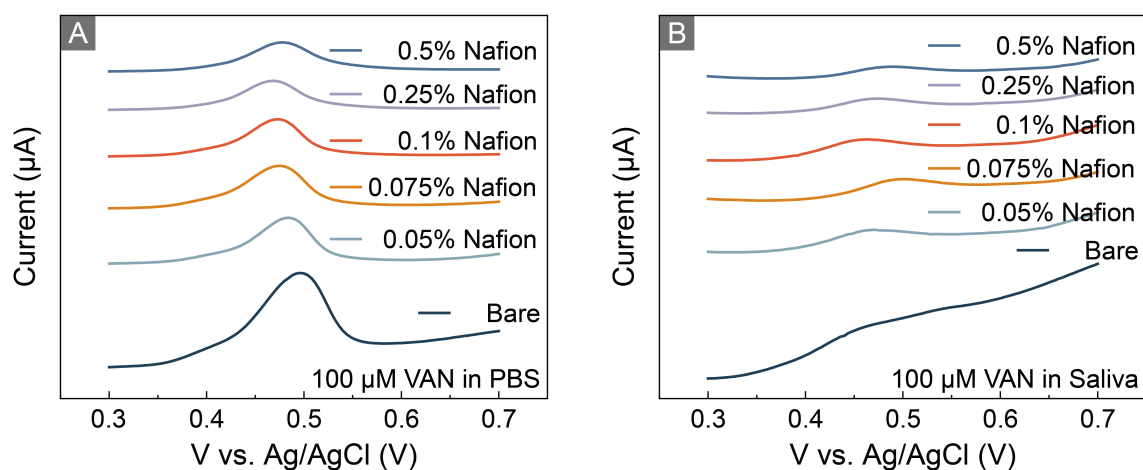

Figure 1: DPV voltammograms with LIG electrodes modified by Nafion with different concentrations (v/v %). (A) DPV voltammograms of 100 μM VAN in PBS. (B) DPV voltammograms of 100 μM VAN in Saliva.

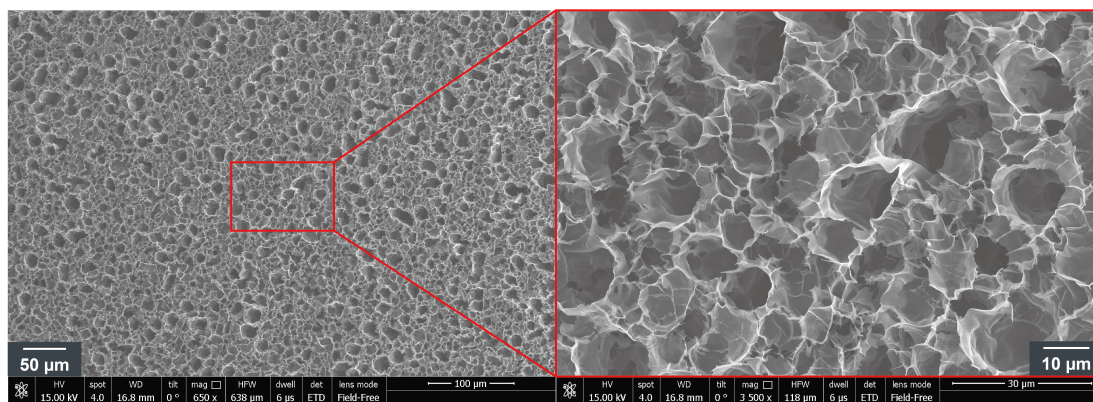

Figure 2: Top view SEM of Nafion-modified LIG at different scales

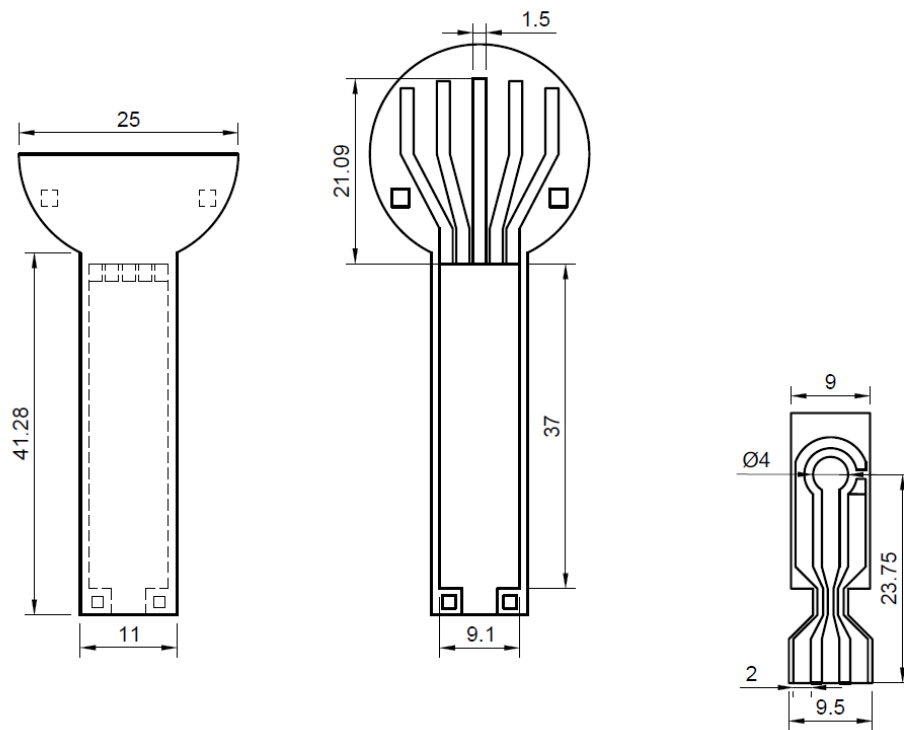

Figure 3: The dimensions of LoL platform and LIG electrodes. The unit is mm.

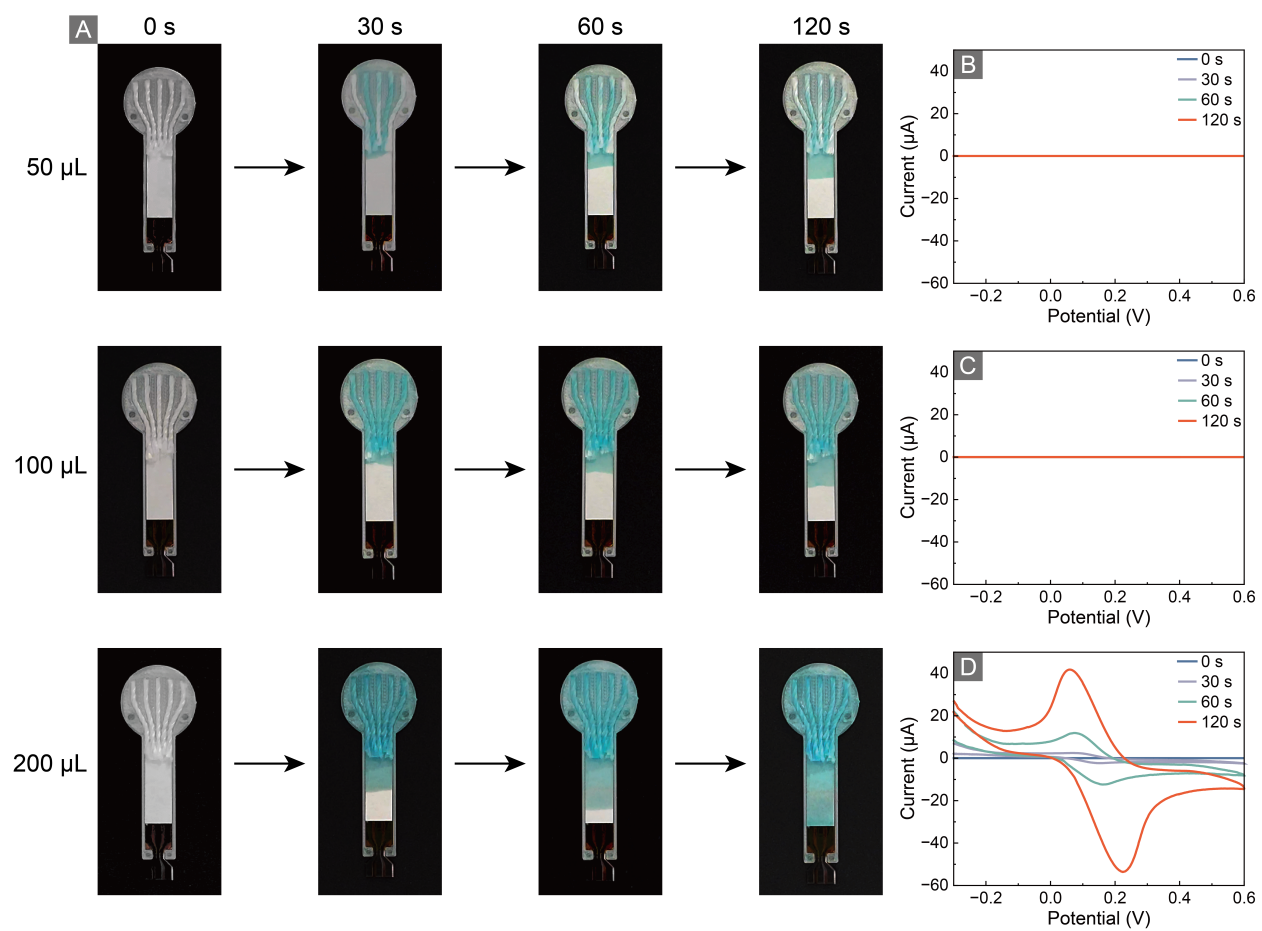

Figure 4: Flow test within lab on a lollipop platform. (A) Dead volume test by adding blue dye solution with different volume on the top of PP fibers loaded in the LoL at different time. (B-D) Cycle voltammetry voltammograms at different time after adding 50  $\mu\text{L}$ , 100  $\mu\text{L}$  or 200  $\mu\text{L}$  2 mM  $[\text{Fe}(\text{CN})_6]^{3-/4-}$  in 100 mM KCl in PBS.
